# Supplementary material for: Improving the Assessment Process of Family Functioning in Adult Bipolar Disorders: A PRISMA Systematic Review
Source: MDPI journal article supplement (doi:10.3390/jcm11030841), 2022-02-05
Supplement: s1 [file s1]

## Data S1. Eligibility criteria

|                                  | <i>Inclusion criteria</i>                 | <i>Exclusion criteria</i>                                                                                                |
|----------------------------------|-------------------------------------------|--------------------------------------------------------------------------------------------------------------------------|
| <i>Language</i>                  | English or French                         | Any other language                                                                                                       |
| <i>Publication date</i>          | No restriction                            | No restriction                                                                                                           |
| <i>Publication status</i>        | Published original research study         | Review articles, books, book chapters, theses, editorials, guidelines, conference abstracts, indexes and model proposals |
| <i>Types of participants</i>     | Adults diagnosed with BD                  | Participants under 18 years old<br>Participants without BD                                                               |
| <i>Types of outcome measures</i> | FF concept assessed in the current family | Other concepts than FF (such as parental and marital relationships)<br>FF of the family-of-origin                        |

*Note:* BD = Bipolar Disorders; FF = family functioning

## Data S2. Example of Electronic Search Strategy

### Search in PubMed:

Search: **"family functioning" AND "bipolar disorder"**

"family functioning"[All Fields] AND "bipolar disorder"[All Fields]
